# Supplementary material for: Systematic elucidation and in vivo validation of sequences enriched in hindbrain transcriptional control
Source: HighWire-hosted journal article supplement (doi:10.1101/gr.139717.112), 2012-07-03
Supplement: Table_S1_training_set.xlsx [file Table_S1_training_set.xlsx]

## Sheet: tmp
Table S1
Coordinates [hg18]	anterior	posterior
hg18:chr1:163103443-163104074	0	0
hg18:chr1:241943090-241944516	1	1
hg18:chr2:104102950-104103797	1	0
hg18:chr10:126895312-126895993	1	1
hg18:chr1:61826021-61828496	1	1
hg18:chr6:97651332-97652480	0	1
hg18:chr8:53329283-53330389	1	1
hg18:chr9:149657-150780	1	1
hg18:chr4:91136056-91140076	1	1
hg18:chr3:148607836-148609026	1	1
hg18:chr4:4910655-4911067	0	0
hg18:chr12:101888739-101889505	0	0
hg18:chr10:77396867-77397624	0	1
hg18:chr21:16603033-16604673	1	1
hg18:chr10:102234832-102236324	1	1
hg18:chr21:39283229-39284996	1	1
hg18:chr15:35299966-35301849	0	1
hg18:chr7:154953491-154953987	1	1
hg18:chr16:52505702-52507347	0	1
hg18:chr7:26695222-26696327	1	0
hg18:chr12:102003353-102004189	1	1
hg18:chr16:49704513-49706143	1	1
hg18:chr12:101878890-101880263	0	0
hg18:chr2:164282253-164283704	1	1
hg18:chr12:101869499-101871030	0	0
hg18:chr3:63647868-63649826	1	1
hg18:chr1:63437807-63438710	1	1
hg18:chr6:22256553-22259366	1	1
hg18:chr16:71296069-71297650	1	0
hg18:chr12:101868242-101869285	0	0
hg18:chr7:25500132-25503405	1	1
hg18:chr12:101930015-101932420	1	1
hg18:chr16:53981917-53983239	0	1
hg18:chr2:146408758-146409753	1	1
hg18:chr9:132343468-132344918	1	1
hg18:chr3:149285047-149286276	1	1
hg18:chr6:99008755-99011237	1	0
hg18:chr11:31777337-31778059	1	1
hg18:chr3:55497520-55497894	1	1
hg18:chr18:47826583-47828509	1	1
hg18:chr4:124602878-124605904	1	0
hg18:chr12:109979780-109980635	1	0
hg18:chr1:196530185-196532365	1	1
hg18:chr9:16700536-16701184	1	0
hg18:chr16:49613812-49615093	1	1
hg18:chrX:136144472-136145537	0	1
hg18:chr9:83489030-83489937	1	1
hg18:chr7:95712783-95716037	1	1
hg18:chr14:37127685-37128567	1	1
hg18:chr18:74107808-74109464	1	1
hg18:chr1:163353286-163353723	1	1
hg18:chr4:85464615-85465579	1	1
hg18:chr6:20975084-20978508	1	1
hg18:chr13:77304129-77305715	1	0
hg18:chr2:157428874-157429832	1	0
hg18:chr8:81036916-81039301	1	1
hg18:chr1:163560098-163560486	0	0
hg18:chr7:154953456-154953635	0	0
hg18:chr9:17312200-17314371	1	1
hg18:chr11:109506105-109508444	1	1
hg18:chr9:83199336-83200686	1	0
hg18:chr9:128452422-128452639	0	0
hg18:chr16:50049300-50050526	1	1
hg18:chr10:131581076-131582838	1	1
hg18:chr11:1941648-1943948	1	1
hg18:chr10:130256858-130257995	1	0
hg18:chr10:92680001-92680654	1	1
hg18:chr14:35884053-35885688	1	0
hg18:chr20:2667208-2667789	1	1
hg18:chr7:13417445-13418244	1	0
hg18:chr18:21118751-21120455	0	1
hg18:chr16:51003551-51004738	0	1
hg18:chr11:31773028-31774997	1	1
hg18:chr15:55212536-55213250	1	1
hg18:chr6:112929006-112933018	1	1
hg18:chr7:135312517-135312761	1	1
hg18:chr11:121304981-121306381	1	1
hg18:chr16:77068109-77069445	0	1
hg18:chr2:104883169-104884922	1	1
hg18:chr1:163582070-163582925	0	0
hg18:chr2:60351561-60355517	1	1
hg18:chr16:980931-981240	0	0
hg18:chr1:163489743-163490276	1	1
hg18:chr18:33317480-33318526	1	1
hg18:chr14:56352553-56353242	0	0
hg18:chr9:127556755-127558193	1	0
hg18:chr5:2257457-2261380	1	1
hg18:chr14:28780636-28783091	1	0
hg18:chr18:17592950-17595920	1	1
hg18:chr16:47470317-47471645	0	1
hg18:chr5:50890201-50891970	1	1
hg18:chr4:4872798-4873167	1	0
hg18:chr2:119327074-119327226	1	1
hg18:chr13:71198850-71200935	1	0
hg18:chr14:36002901-36004283	1	1
hg18:chr1:165563578-165565670	1	1
hg18:chr9:97297680-97299226	1	1
hg18:chr9:128336726-128337203	1	1
hg18:chr6:23287991-23290165	1	1
hg18:chr20:20420953-20422200	1	1
hg18:chr22:36772086-36772825	0	1
hg18:chr12:24125151-24126901	1	1
hg18:chrX:139159799-139161042	1	1
hg18:chr9:132530376-132531049	1	1
hg18:chr2:5467069-5470476	1	1
hg18:chr2:144904569-144906282	1	1
hg18:chr13:70431038-70432196	1	1
hg18:chrX:81675540-81677227	0	1
hg18:chr1:88699384-88701096	1	1
hg18:chr5:158418698-158420076	1	1
hg18:chr8:28426786-28427779	1	1
hg18:chr10:130996512-130998732	1	1
hg18:chr9:128323357-128323754	0	0
hg18:chr18:73698561-73699850	1	1
hg18:chr9:80661567-80662934	1	0
hg18:chr1:163295297-163295721	1	1
hg18:chr2:60708560-60710392	1	1
hg18:chr18:40576321-40579999	1	1
hg18:chr6:51256627-51257669	1	0
hg18:chr1:163586660-163587236	0	0
hg18:chr18:41422345-41424727	0	1
hg18:chr6:98222806-98223664	0	0
hg18:chr18:51240623-51242077	1	1
hg18:chr5:90964368-90964982	1	0
hg18:chr3:159258436-159260694	1	1
hg18:chr9:3391031-3392562	1	1
hg18:chr9:83454015-83456770	1	1
hg18:chr4:153507105-153509967	1	1
hg18:chr7:25758428-25760807	1	0
hg18:chr2:103275790-103277653	0	0
hg18:chrX:138997045-138999211	1	0
hg18:chr16:51026030-51029263	1	1
hg18:chr12:101874201-101874528	0	0
hg18:chr14:25447212-25448643	0	1
hg18:chr15:34606313-34607987	1	1
hg18:chr7:154956808-154958570	1	1
hg18:chr3:183441468-183443821	1	1
hg18:chr4:13877931-13879022	1	1
hg18:chr9:22994730-22995789	0	1
hg18:chr5:87727910-87729021	1	1
hg18:chr6:98598550-98599959	1	0
hg18:chr16:10227330-10228377	1	0
hg18:chr13:94416465-94417820	1	1
hg18:chr9:128428640-128429131	1	1
hg18:chr4:145496263-145498169	1	1
hg18:chr3:54992515-54993600	0	0
hg18:chr13:104813599-104814928	1	1
hg18:chr14:28813125-28815632	1	1
hg18:chr13:27293961-27295536	1	1
hg18:chr11:31797972-31798400	1	1
hg18:chr1:163628920-163629320	1	1
hg18:chr7:18852496-18853755	0	1
hg18:chr2:103383078-103386256	1	1
hg18:chr18:73625326-73627495	0	1
hg18:chr20:21436551-21438021	1	0
hg18:chr7:114114148-114117008	0	1
hg18:chr16:78930094-78931256	1	1
hg18:chr1:3180441-3181288	0	1
hg18:chr7:114251033-114251698	1	0
hg18:chr2:176648316-176649656	1	0
hg18:chr4:113650831-113651608	1	1
hg18:chr1:163111727-163112717	1	0
hg18:chr9:81465940-81468354	1	1
hg18:chr12:17739378-17740614	1	0
hg18:chr5:3250865-3251942	1	1
hg18:chr7:14346152-14347265	1	1
hg18:chr16:84987588-84988227	0	1
hg18:chr14:29811501-29813377	1	0
hg18:chr13:71323788-71326336	1	1
hg18:chr3:148861237-148863293	0	1
hg18:chr13:94156264-94158018	1	1
hg18:chr17:32403462-32404057	1	1
hg18:chr5:92167267-92169293	1	1
hg18:chr9:91482304-91483709	1	1
hg18:chr9:37241207-37242223	1	0
hg18:chr5:87275698-87277401	1	1
hg18:chr3:138550312-138551615	1	0
hg18:chr2:3247203-3249856	0	1
hg18:chr20:38767596-38768473	0	1
hg18:chr12:16501312-16503203	1	1
hg18:chr5:170560595-170562623	1	1
hg18:chr1:163116292-163117011	1	1
hg18:chr1:202690581-202691558	1	1
hg18:chr18:43341288-43342072	1	0
hg18:chr9:81871088-81872512	1	1
hg18:chr1:162886662-162887788	1	1
hg18:chr2:59330108-59331459	0	1
hg18:chr4:41576125-41576259	0	0
hg18:chr10:36012898-36015938	1	1
hg18:chr7:35425076-35426047	0	1
hg18:chr2:67134761-67136044	0	1
hg18:chr1:161708565-161709466	0	1
hg18:chr5:91072644-91074655	0	1
hg18:chr12:101895477-101896740	1	1
hg18:chr1:39021344-39022716	1	0
hg18:chr20:29655377-29656215	1	1
hg18:chr6:50793203-50794196	1	0
hg18:chr5:3235218-3236271	1	0
hg18:chr2:105063643-105064590	1	1
hg18:chr6:140249670-140253462	1	0
hg18:chr13:34670272-34672420	1	1
hg18:chr1:163520145-163520687	1	0
hg18:chr8:78205126-78206756	0	1
hg18:chr12:17203051-17205026	1	1
hg18:chr12:65413371-65415997	0	1
hg18:chr3:55495308-55495533	0	0
hg18:chr16:48292600-48293950	1	1
hg18:chr7:42219356-42221085	1	1
hg18:chr15:34752111-34753390	1	1
hg18:chr4:56614346-56618550	1	1
hg18:chr1:216274055-216275121	1	1
