# Supplementary material for: Systematic elucidation and in vivo validation of sequences enriched in hindbrain transcriptional control
Source: HighWire-hosted journal article supplement (doi:10.1101/gr.139717.112), 2012-07-03
Supplement: Table_S4_Hb_genes.xlsx [file Table_S4_Hb_genes.xlsx]

## Sheet: Hb_genes
Table S3
Hindbrain genes
# We identified a set of 786 human genes likely to be involved in Hb function by retrieving genes with relevant phenotypes from the Online Mendelian Inheritance in Man (OMIM) database (Amberger, Bocchini et al. 2009) and the corresponding orthologs of genes with pertinent annotation in the Mammalian Phenotype (MP) Browser at the Mouse Genome Informatics website, The Jackson Laboratory, Bar Harbor…
ABCD1
ABCD2
ABHD14A
ABR
ACAN
ACCN1
ACCN3
ACP2
ADAM10
ADAMTS4
ADCY1
ADCYAP1
ADCYAP1R1
ADM
ADRA2C
ADRBK1
AFAP1
AFF1
AFG3L2
AGA
AGTPBP1
AHI1
AICDA
AIFM1
ALDH1A2
ALS2
AMBRA1
ANK1
ANK3
AP3D1
AP4B1
APAF1
APBB1
APC
APOD
APOE
APP
AQP4
AR
ARCN1
ARHGAP5
ARHGDIA
ARL4A
ARSA
ARX
ASCL1
ASPA
ASTN1
ATF2
ATG5
ATG7
ATM
ATOH1
ATP1B2
ATP2B2
ATP7A
ATP7B
ATP8B1
ATRN
ATXN1
ATXN2
ATXN7
ATXN8OS
AVIL
AXL
B4GALNT1
B4GALT2
BACE1
BAX
BCL10
BCL2
BCL2L1
BCL2L2
BCR
BDNF
BHLHE22
BID
BMI1
BRCA2
C11orf9
C7orf16
CA8
CACNA1A
CACNA1D
CACNA2D2
CACNG2
CACNG3
CACNG4
CADM1
CADPS2
CALB1
CAMK2B
CAMK4
CAPN1
CARD10
CASP2
CASP3
CASP9
CBLN1
CBLN3
CBS
CCKBR
CCND1
CCND2
CCNF
CDH23
CDK5
CDK5R1
CDK5R2
CDKN1B
CDKN2C
CDX1
CEP290
CHN1
CHRD
CHRFAM7A
CHRM2
CHRNA3
CHRNA4
CHRNA7
CHRNB2
CHRNB4
CHUK
CIT
CITED2
CKB
CLCN2
CLIC5
CLN3
CNIH2
CNP
CNPY1
CNR1
CNR2
CNTFR
CNTN1
CNTN6
COMT
CP
CRABP1
CREB1
CREBBP
CRHR2
CRK
CRKL
CRMP1
CRYBB2
CSTB
CTNNA2
CTNNB1
CTSB
CTSD
CTSL1
CXCL12
CXCR3
CXCR4
CXCR6
CXorf56
CYP11A1
CYP26A1
CYP26B1
CYP26C1
CYP2U1
CYS1
DAB1
DAG1
DCC
DCLK1
DCX
DDB1
DDIT3
DHCR7
DISC1
DISP1
DLC1
DLG4
DLX5
DLX6
DMBX1
DNAH5
DNAJC3
DNER
DNM1L
DOC2B
DOCK3
DPF3
DRD2
DRD3
DRD4
DSCAM
DVL1
DYNC1H1
DYNC2H1
DYNC2LI1
DYRK1A
E2F6
EBF2
EDARADD
EEF1A2
EFHC1
EFNA2
EFNA5
EFNB2
EGFR
EGR2
EIF2AK3
EMX1
EMX2
EN1
EN2
ENAH
ENO2
EPB41L1
EPB41L2
EPHA2
EPHA4
EPHA7
EPHB1
EPHB2
EPM2A
ERBB2
ERBB3
ERBB4
ERCC2
ERCC5
ERCC6
ERF
ESCO2
ESPN
ESR1
EXT1
EXT2
EYA1
F2
FAS
FAT2
FBLN1
FBXO2
FGF17
FGF20
FGF3
FGF8
FGF9
FGFR1
FGFR2
FGFRL1
FIGN
FKBP8
FLNA
FMR1
FNDC4
FOXA2
FOXB1
FOXC1
FOXI1
FOXP2
FRMD7
FRS2
FST
FUZ
FZD3
FZD4
GABARAP
GABBR1
GABBR2
GABRA1
GABRA5
GABRB2
GABRB3
GABRQ
GAL
GALC
GALNT9
GAS1
GBA
GBX2
GDA
GDF10
GDF11
GDF3
GDF7
GDNF
GFAP
GFI1
GJA1
GLB1
GLI1
GLI2
GLI3
GLRB
GM2A
GNAS
GNB5
GNG7
GNPAT
GNRH1
GPR98
GPX1
GRIA1
GRIA2
GRID2
GRIN1
GRIN2C
GRLF1
GRM1
GRM4
GRM5
GRXCR1
GSC
GSX2
HAR1A
HCN1
HCRTR1
HCRTR2
HEPH
HES1
HES3
HES5
HEXB
HGF
HIF1A
HIRA
HOMER3
HOXA1
HOXA2
HOXB1
HOXB13
HOXB2
HPN
HPSE2
HR
HRH1
HSD11B1
HSD17B7
HSPA5
HSPB1
HTR1A
HTRA2
HTT
HYDIN
HYOU1
IDUA
IFNG
IFT172
IFT57
IFT88
IGF1
IGF1R
IKBKB
IL17RD
IL1RAPL1
IL6
IL8RB # replacing CXCR2
INPP4A
INPP5E
INSR
IREB2
ITGB1
ITPR2
ITPR3
JAKMIP1
JPH3
JPH4
KCNE1
KCNIP1
KCNIP2
KCNIP4
KCNJ10
KCNJ16
KCNJ3
KCNJ5
KCNJ6
KCNK5
KCNK9
KCNQ1
KCNQ2
KCNQ3
KIF1B
KIF2A
KIF3A
KIF3B
KIF7
KIFAP3
KIT
KITLG
KL
KLHL1
L1CAM
LAMA2
LASS2
LATS2
LBX1
LBXCOR1
LDB1
LDLR
LEP
LEPR
LHFPL5
LHX1
LHX3
LHX4
LHX5
LIG4
LIX1
LMNB2
LMO1
LMO4
LMX1A
LMX1B
LOXHD1
LRP6
LRP8
LUZP1
LYNX1
LYST
MAB21L1
MAFB
MAN2B1
MANBA
MAP1B
MAP2
MAP2K4
MAPK8
MAPK8IP1
MAPK8IP2
MAPK8IP3
MAPK9
MAPT
2012-03-07
MARCKS
MC1R
MCHR1
MCOLN3
MDM2
MDM4
MEOX2
MERTK
MET
MFN1
MFN2
MGAT5B
MIB1
MID1
MLL
MMP24
MMP9
MNX1
MOG
MPV17
MPZ
MRE11A
MSX1
MSX2
MT1A
MTHFR
MYC
MYCN
MYH10
MYL5
MYO15A
MYO16
MYO5A
MYO7A
NAB1
NAB2
NAGLU
NAPA
NAV2
NBN
NCAM1
NCK2
NCOA1
NCOA2
NDP
NDST1
NDST3
NEK1
NEUROD1
NEUROD2
NEUROD4
NEUROG2
NF1
NFASC
NFIA
NFIB
NFKB1
NGFR
NHEJ1
NHLH1
NHLH2
NIPBL
NKX2-2
NKX6-2
NKX6-3
NOG
NOS1
NOS3
NOVA1
NPAS3
NPC1
NPC2
NPFFR2
NPTN
NR1D1
NR1H2
NR1H3
NR2C2
NR2E1
NR2F1
NR2F2
NRCAM
NRG1
NRGN
NRP1
NTF3
NTN1
NTNG1
NTRK1
NTRK2
NTRK3
NUMB
NXF1
OCLN
OFD1
OGDH
OLIG2
OLIG3
OPHN1
OTX1
OTX2
PAFAH1B1
PANX1
PARK2
PARK7
PAX2
PAX3
PAX5
PAX6
PAX7
PCDH15
PCGF2
PCSK5
PDE1C
PDE4D
PDHA1
PDYN
PEX7
PFDN1
PFN1
PHC2
PHEX
PHGDH
PHOX2A
PHOX2B
PHYH
PI4K2A
PINK1
PIP5K1C
PITPNA
PLA2G6
PLAT
PLCB4
PLP2
PLXNA2
PLXNB2
PNPLA6
POLG
POMGNT1
PON1
PON2
PON3
POU1F1
POU3F2
POU3F3
POU4F1
POU4F3
PPARG
PPARGC1A
PPP2R2B
PPT1
PRDX1
PRKAB1
PRKCG
PRKDC
PRKG1
PRLH
PRND
PRNP
PSAP
PSEN1
PSEN2
PTCH1
PTCH2
PTEN
PTF1A
PTK2
PURA
PVALB
PXMP3 # replacing PEX2
QKI
RAB23
RAC1
RAC3
RAG1
RAPGEF2
RASA1
RAVER2
RB1
RBL1
RBM14
RBM4
RBPJ
RELN
REST
RET
RGS9
RIT2
RNF103
RNF111
RNF2
ROBO1
ROBO3
RORA
RPGRIP1L
RPS6KA3
RXRA
RXRB
S1PR2
S1PR3
SCARB2
SCN2A
SCN8A
SCT
SCTR
SCUBE1
SCYL1
SDF4
SEMA3A
SEMA6A
SERPINE2
SGCE
SGMS1
SHH
SIL1
SLAIN1
SLC12A6
SLC12A7
SLC17A1
SLC17A5
SLC17A6
SLC17A8
SLC1A3
SLC1A6
SLC24A2
SLC25A44
SLC25A46
SLC26A4
SLC26A5
SLC30A3
SLC4A10
SLC4A7
SLC6A4
SLC9A1
SLC9A3
SLIT1
SLIT2
SLIT3
SLITRK6
SMAD1
SMAD2
SMAD4
SMAD5
SMAD9
SMO
SMPD1
SNCA
SNCB
SNTG1
SNTG2
SOAT1
SOD1
SOD2
SOX1
SOX10
SOX2
SOX3
SOX8
SOX9
SP8
SPARCL1
SPHK1
SPHK2
SPTBN4
SQSTM1
SS18L1
SSBP3
ST5
ST8SIA2
ST8SIA4
STIM1
SUFU
SUMF1
SUZ12
SVOP
SYNM
SYP
T
TBP
TBX1
TCF4
TCF7L2
TDP1
TEAD1
TFAP2A
TGFB1
TGFB2
TGFBR2
TGIF1
TH
THRA
THRB
TLX1
TLX3
TMC1
TMED10
TMEM176B
TMEM216
TMEM216 # replacing MKS2
TMEM67
TMIE
TMOD1
TNF
TOP1
TOR1A
TP53
TPH1
TPH2
TPP1
TRIM2
TRPC3
TTBK2
TUB
TUBB3
TULP3
TXNRD1
TYMP
TYRO3
UBE3A
UBE4B
UCHL1
UGCG
UNC13C
UNC5A
UNC5C
UPP1
UQCRB
USE1
USH1C
USP14
VAC14
VANGL2
VEGFA
VIM
VIPR1
VIPR2
VLDLR
VPS24
VSNL1
WNT1
WNT11
WNT3A
WNT7A
XPA
XRCC1
XRCC2
XRCC4
XRCC5
ZCRB1
ZIC1
ZIC2
ZIC3
ZIC4
ZIC5
ZNF238
ZNF385A
ZNF423
