# Supplementary figures and images for: Systematic elucidation and in vivo validation of sequences enriched in hindbrain transcriptional control
Source: HighWire-hosted journal article supplement (doi:10.1101/gr.139717.112), 2012-07-03

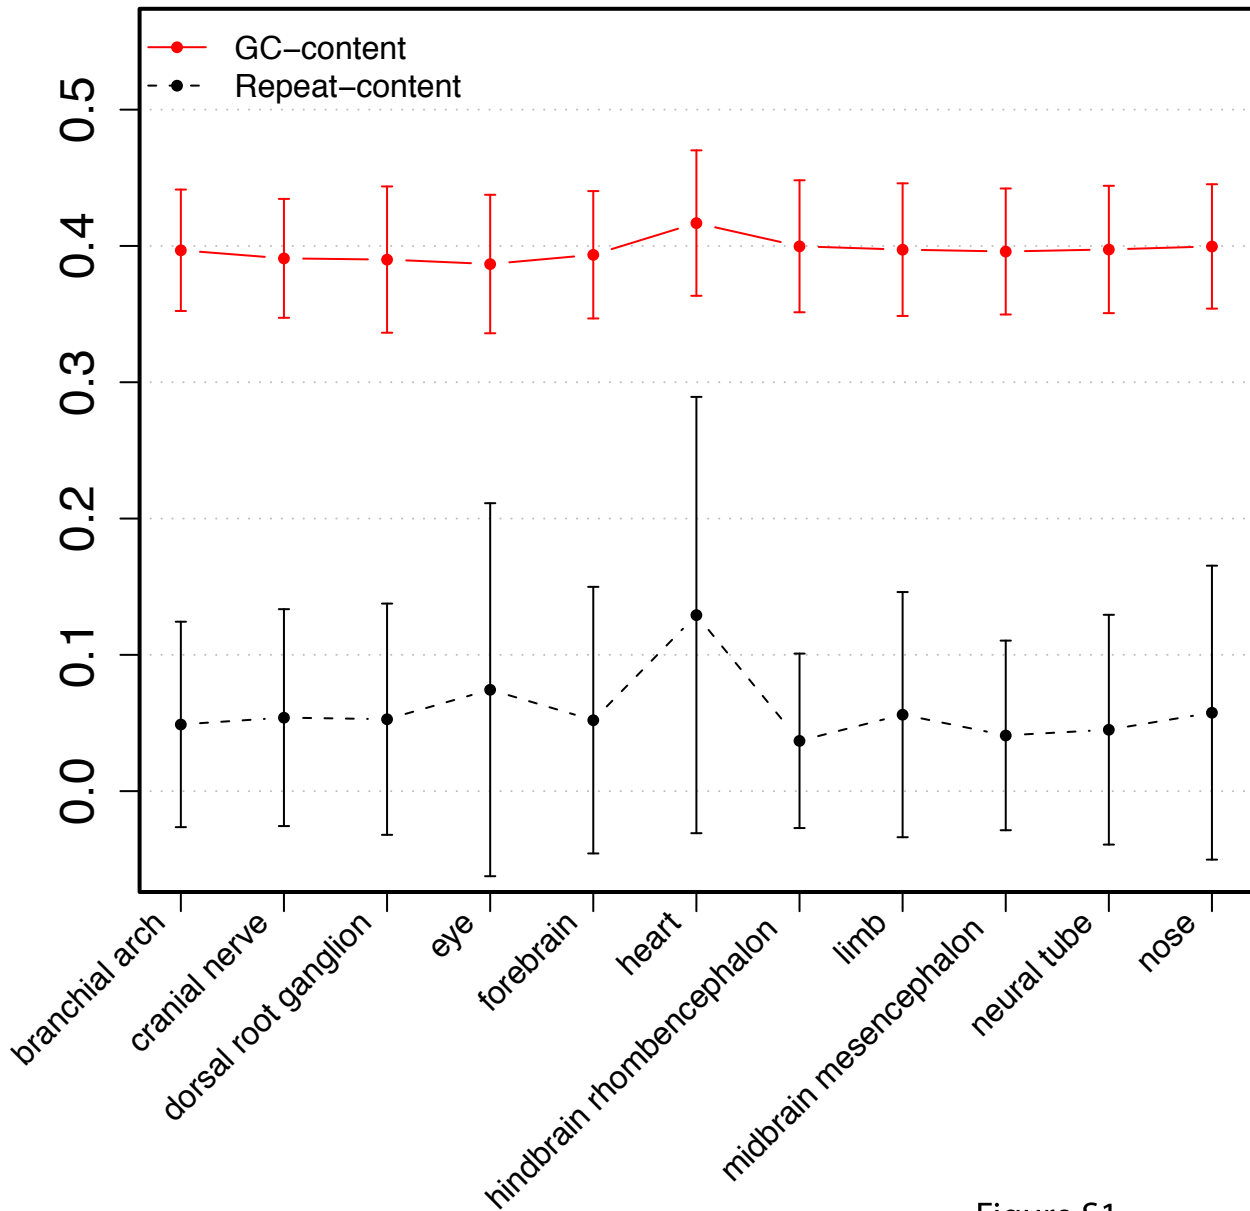

Figure S1

Supplement: Figure_S1.pdf [file Figure_S1.pdf]

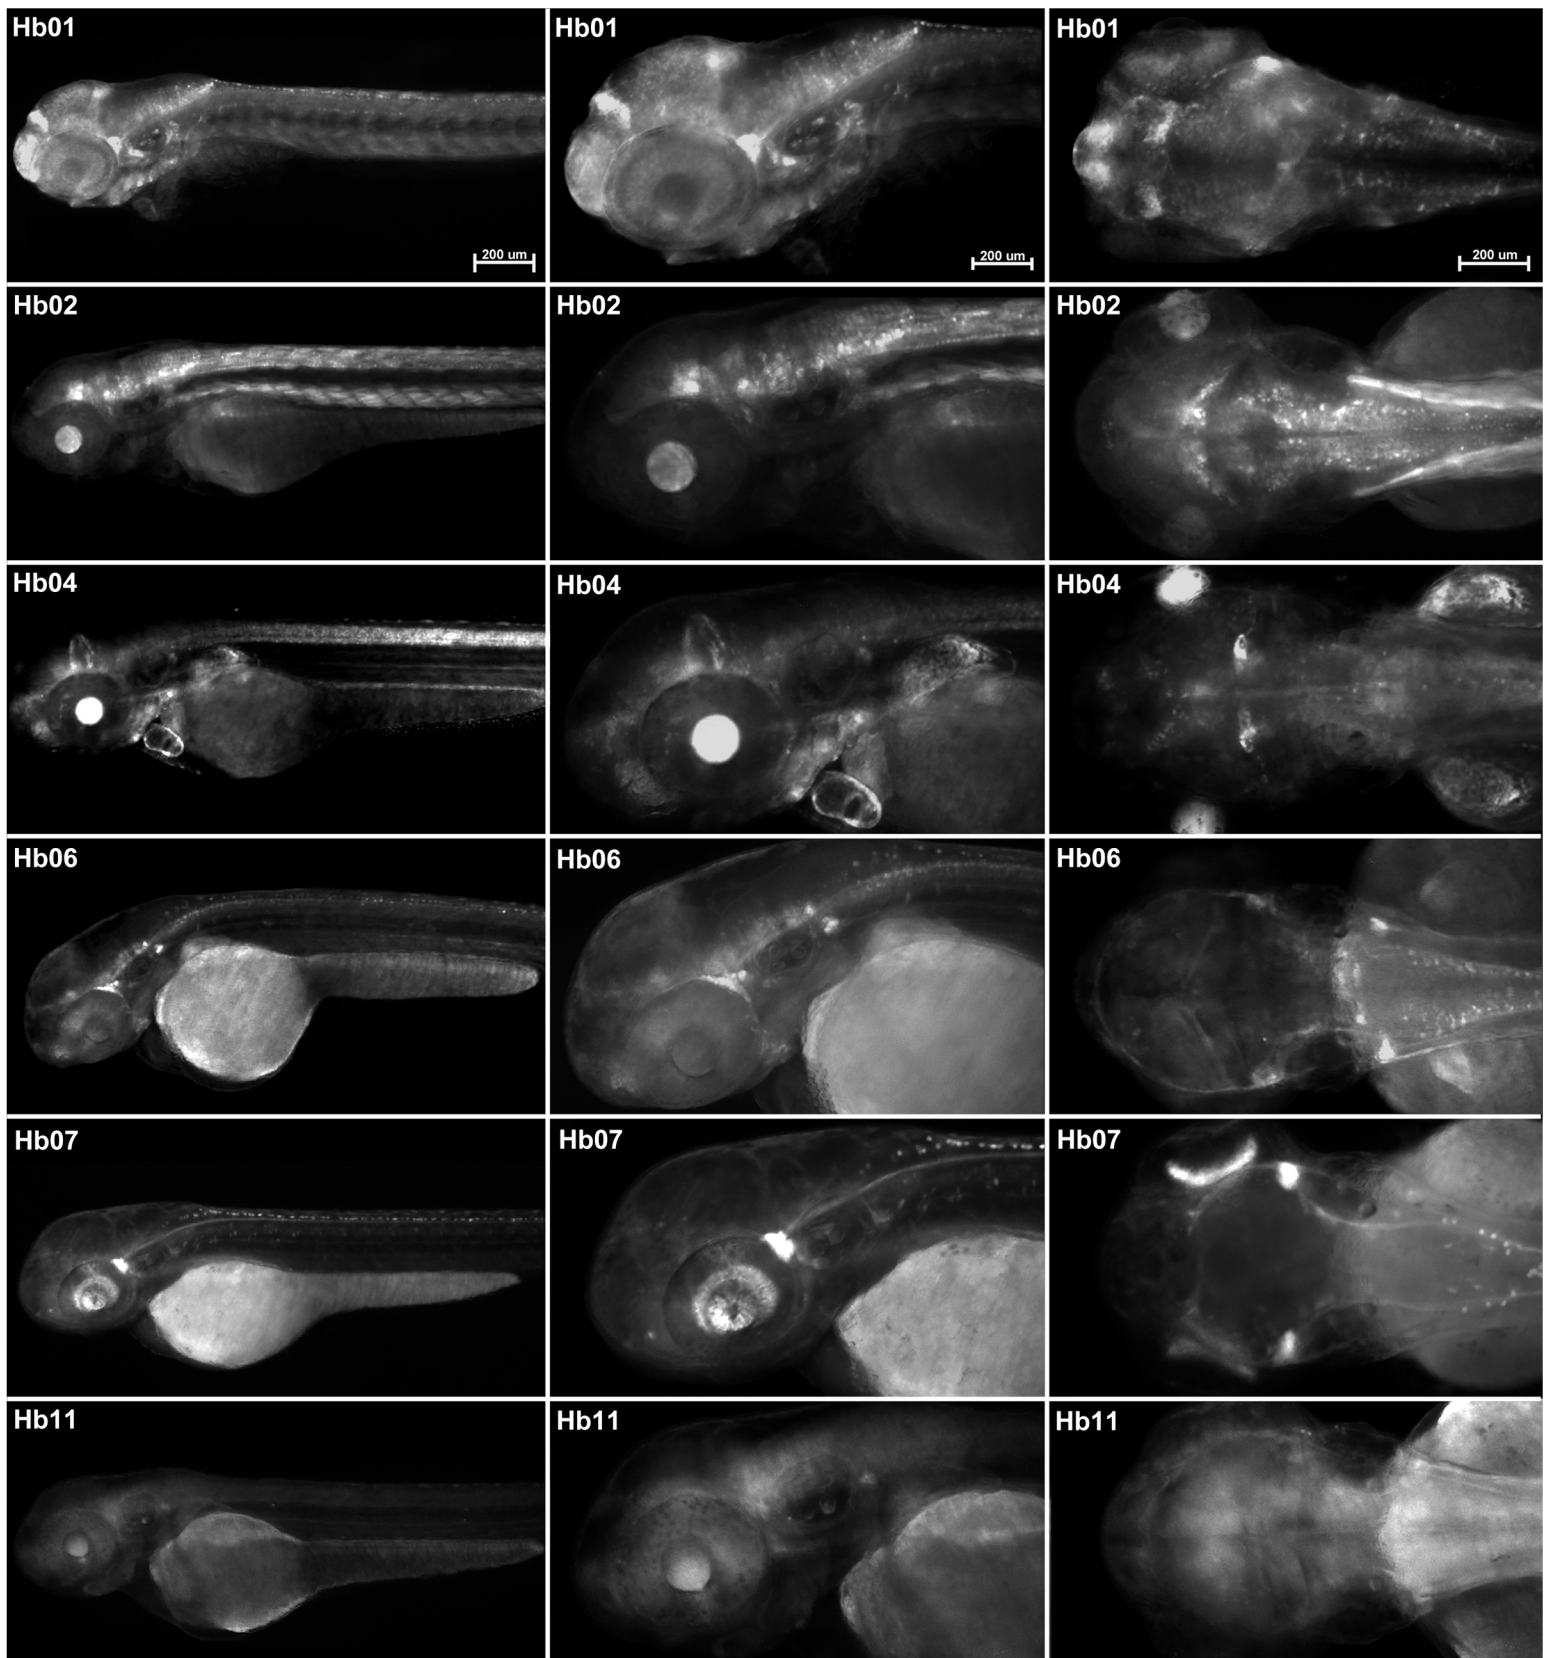

Figure S3\_panel\_1

Supplement: Figure_S5_panel_1.pdf [file Figure_S5_panel_1.pdf]

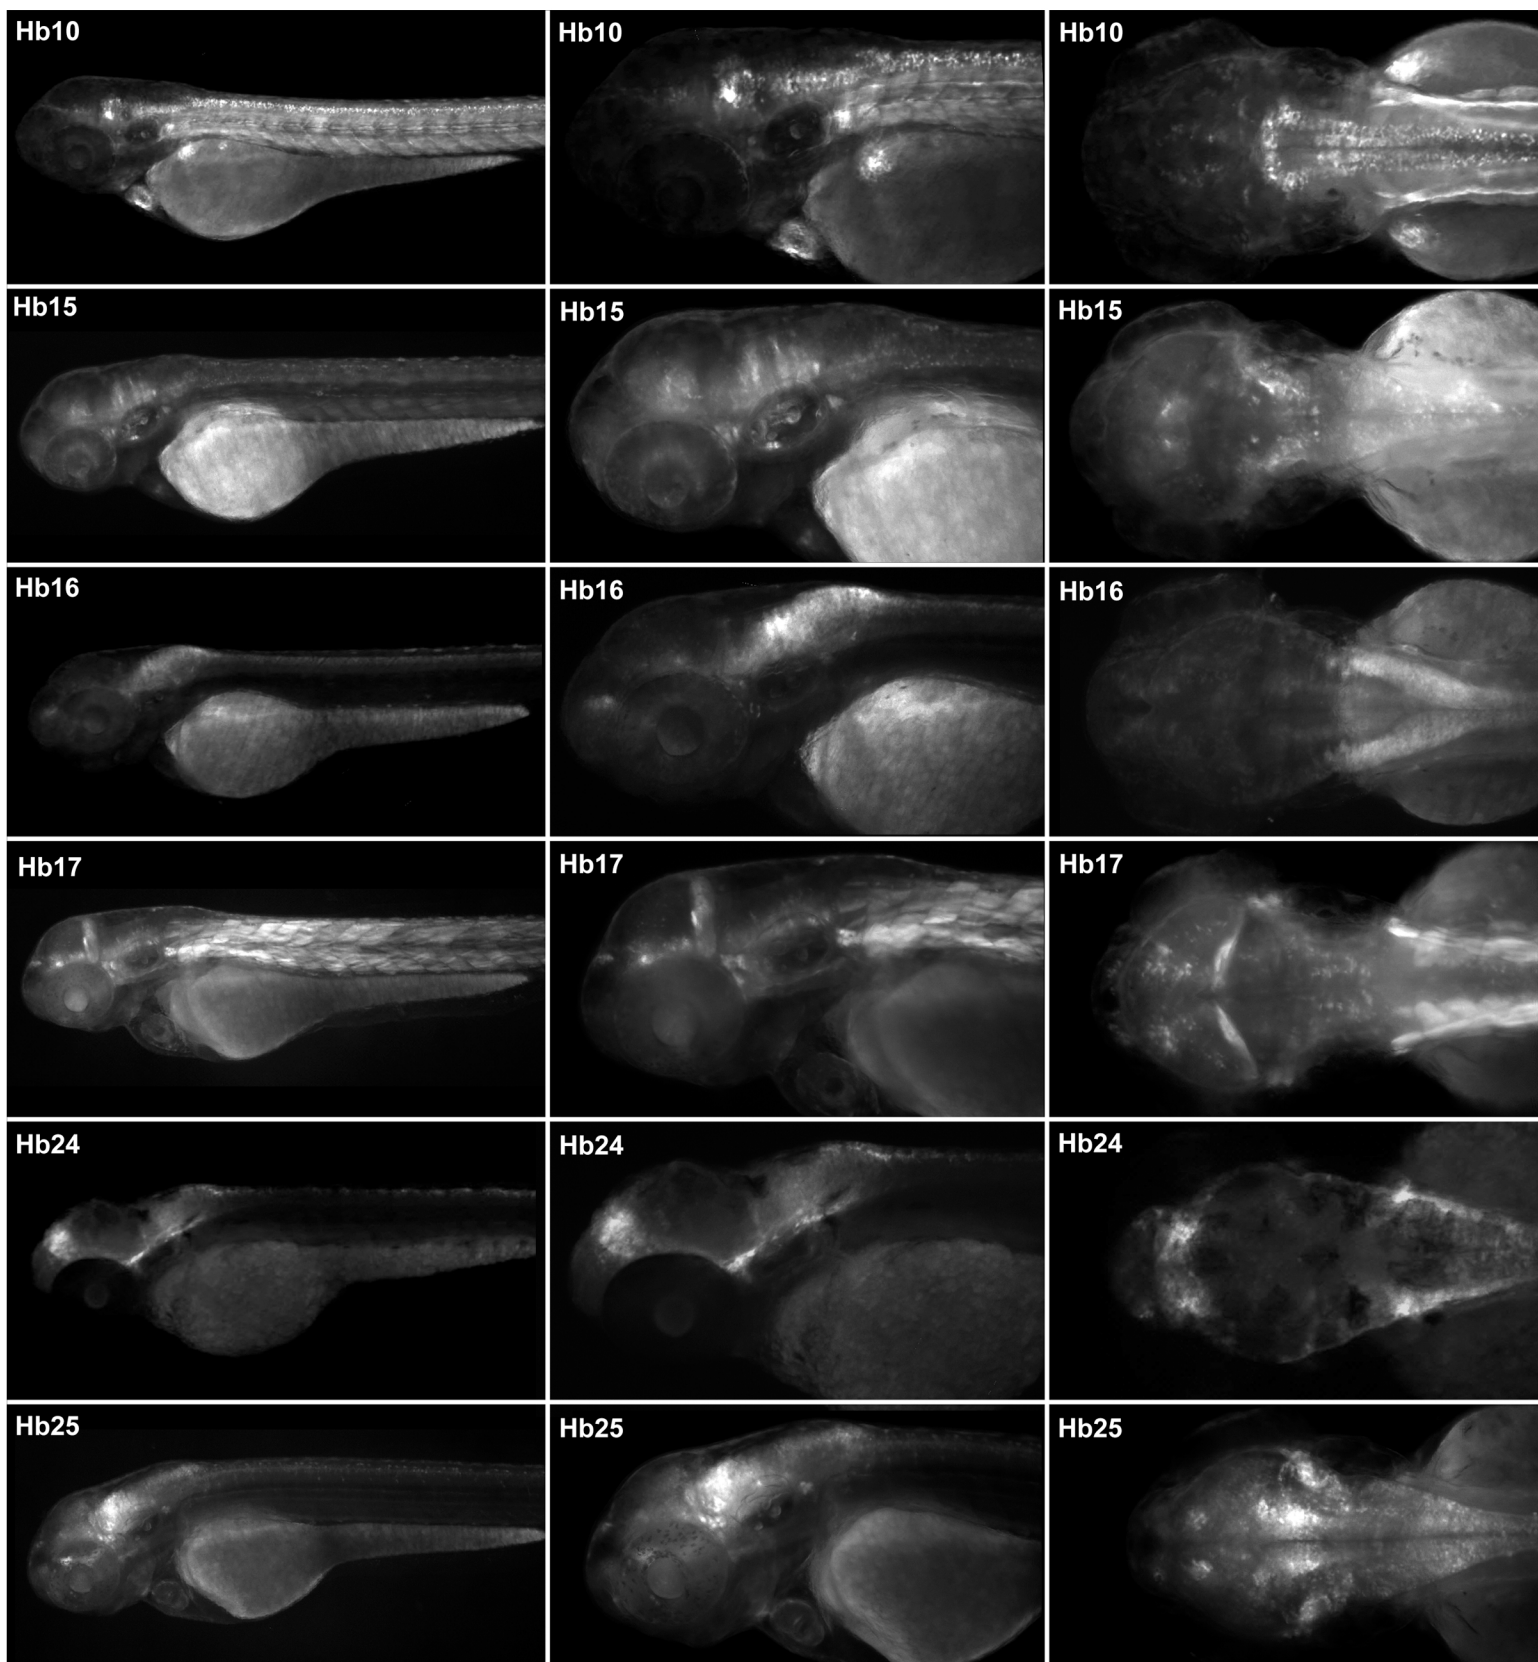

Figure S3\_panel\_2

Supplement: Figure_S5_panel_2.pdf [file Figure_S5_panel_2.pdf]

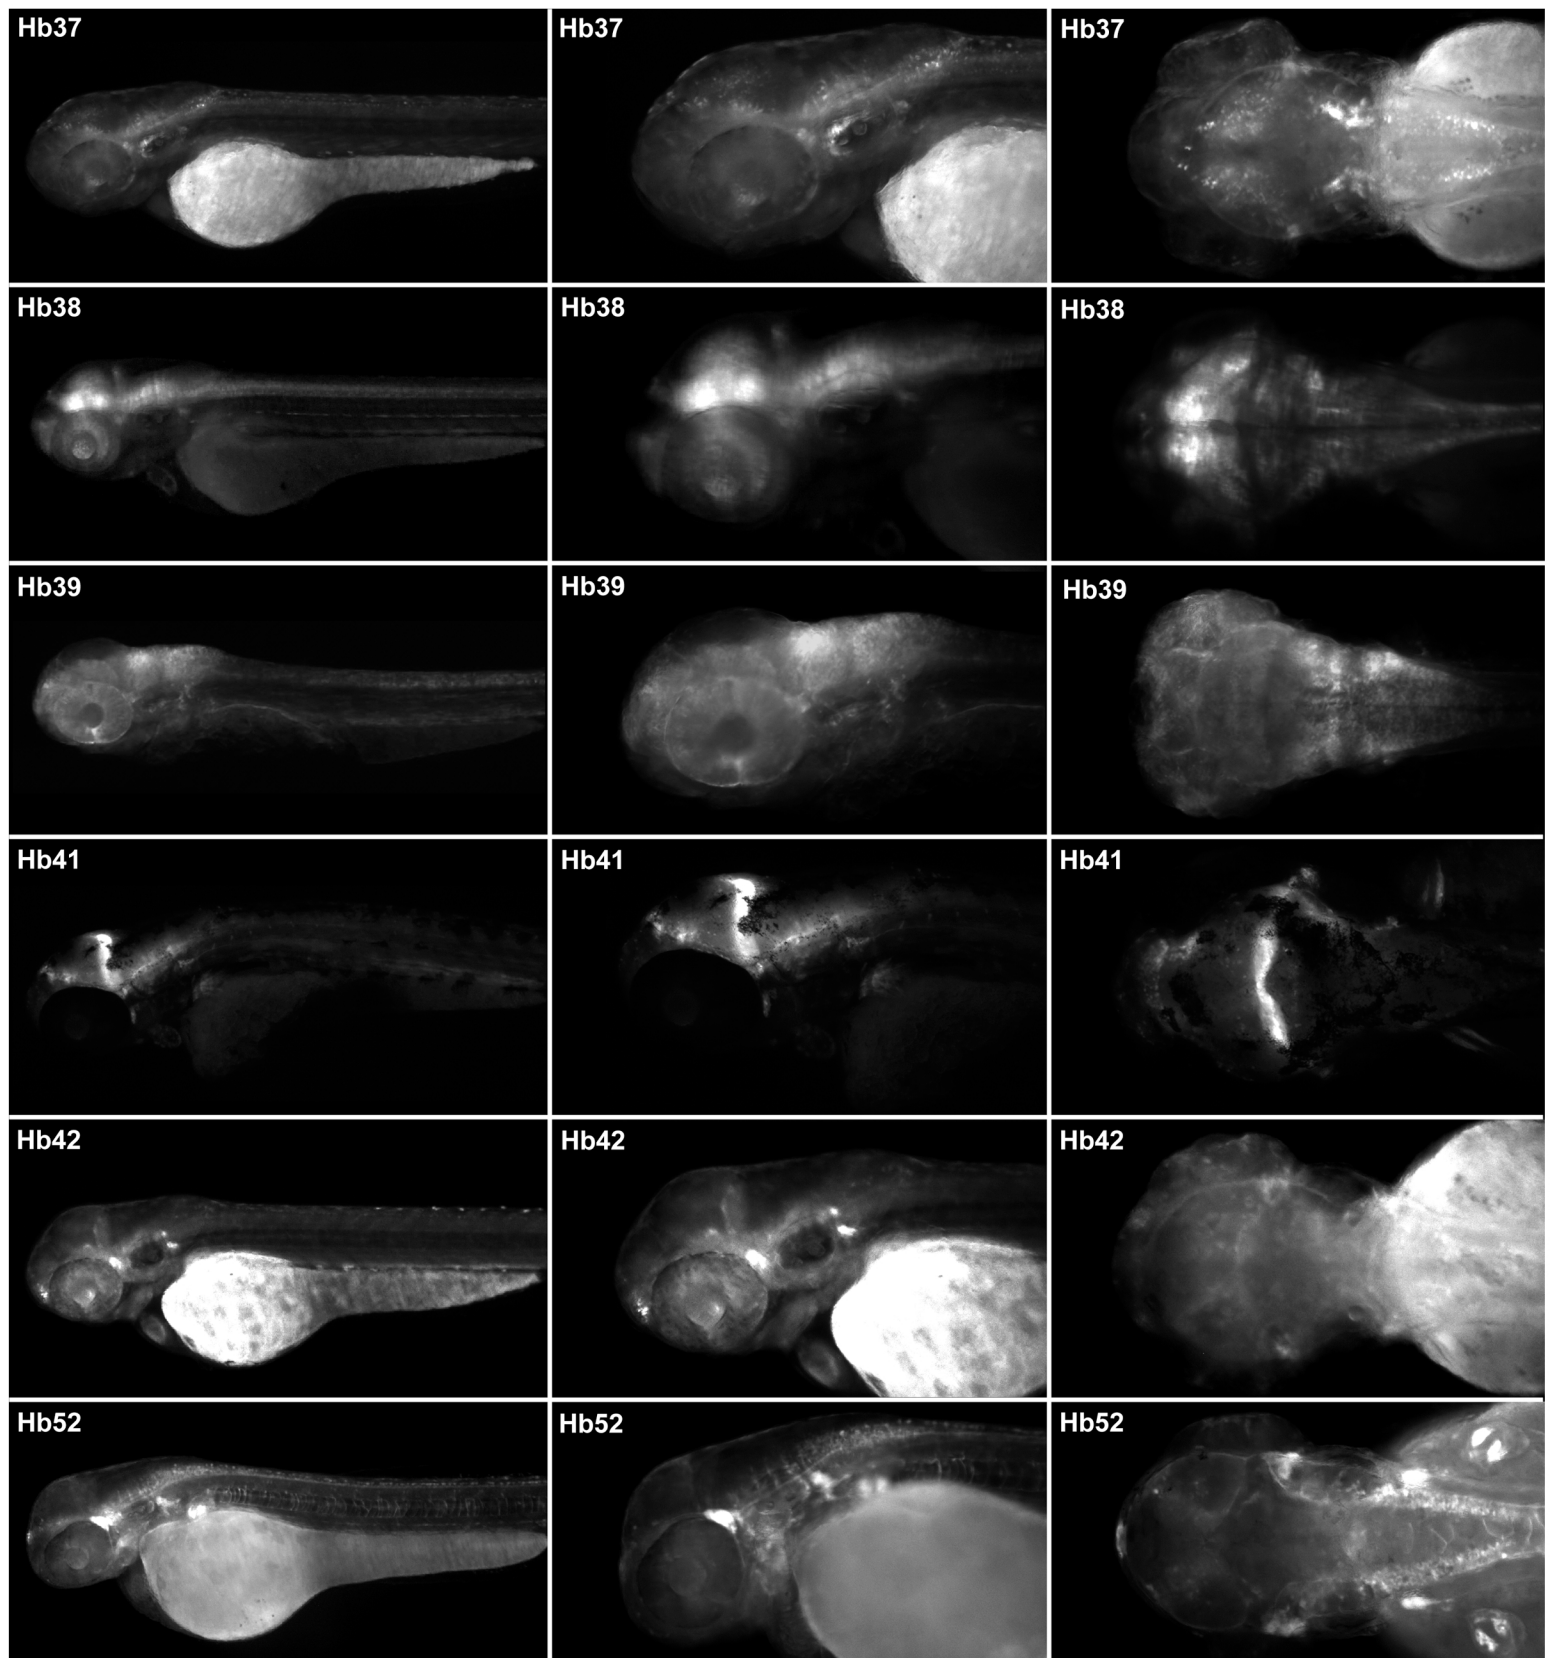

**Figure S3\_panel\_4**

Supplement: Figure_S5_panel_4.pdf [file Figure_S5_panel_4.pdf]

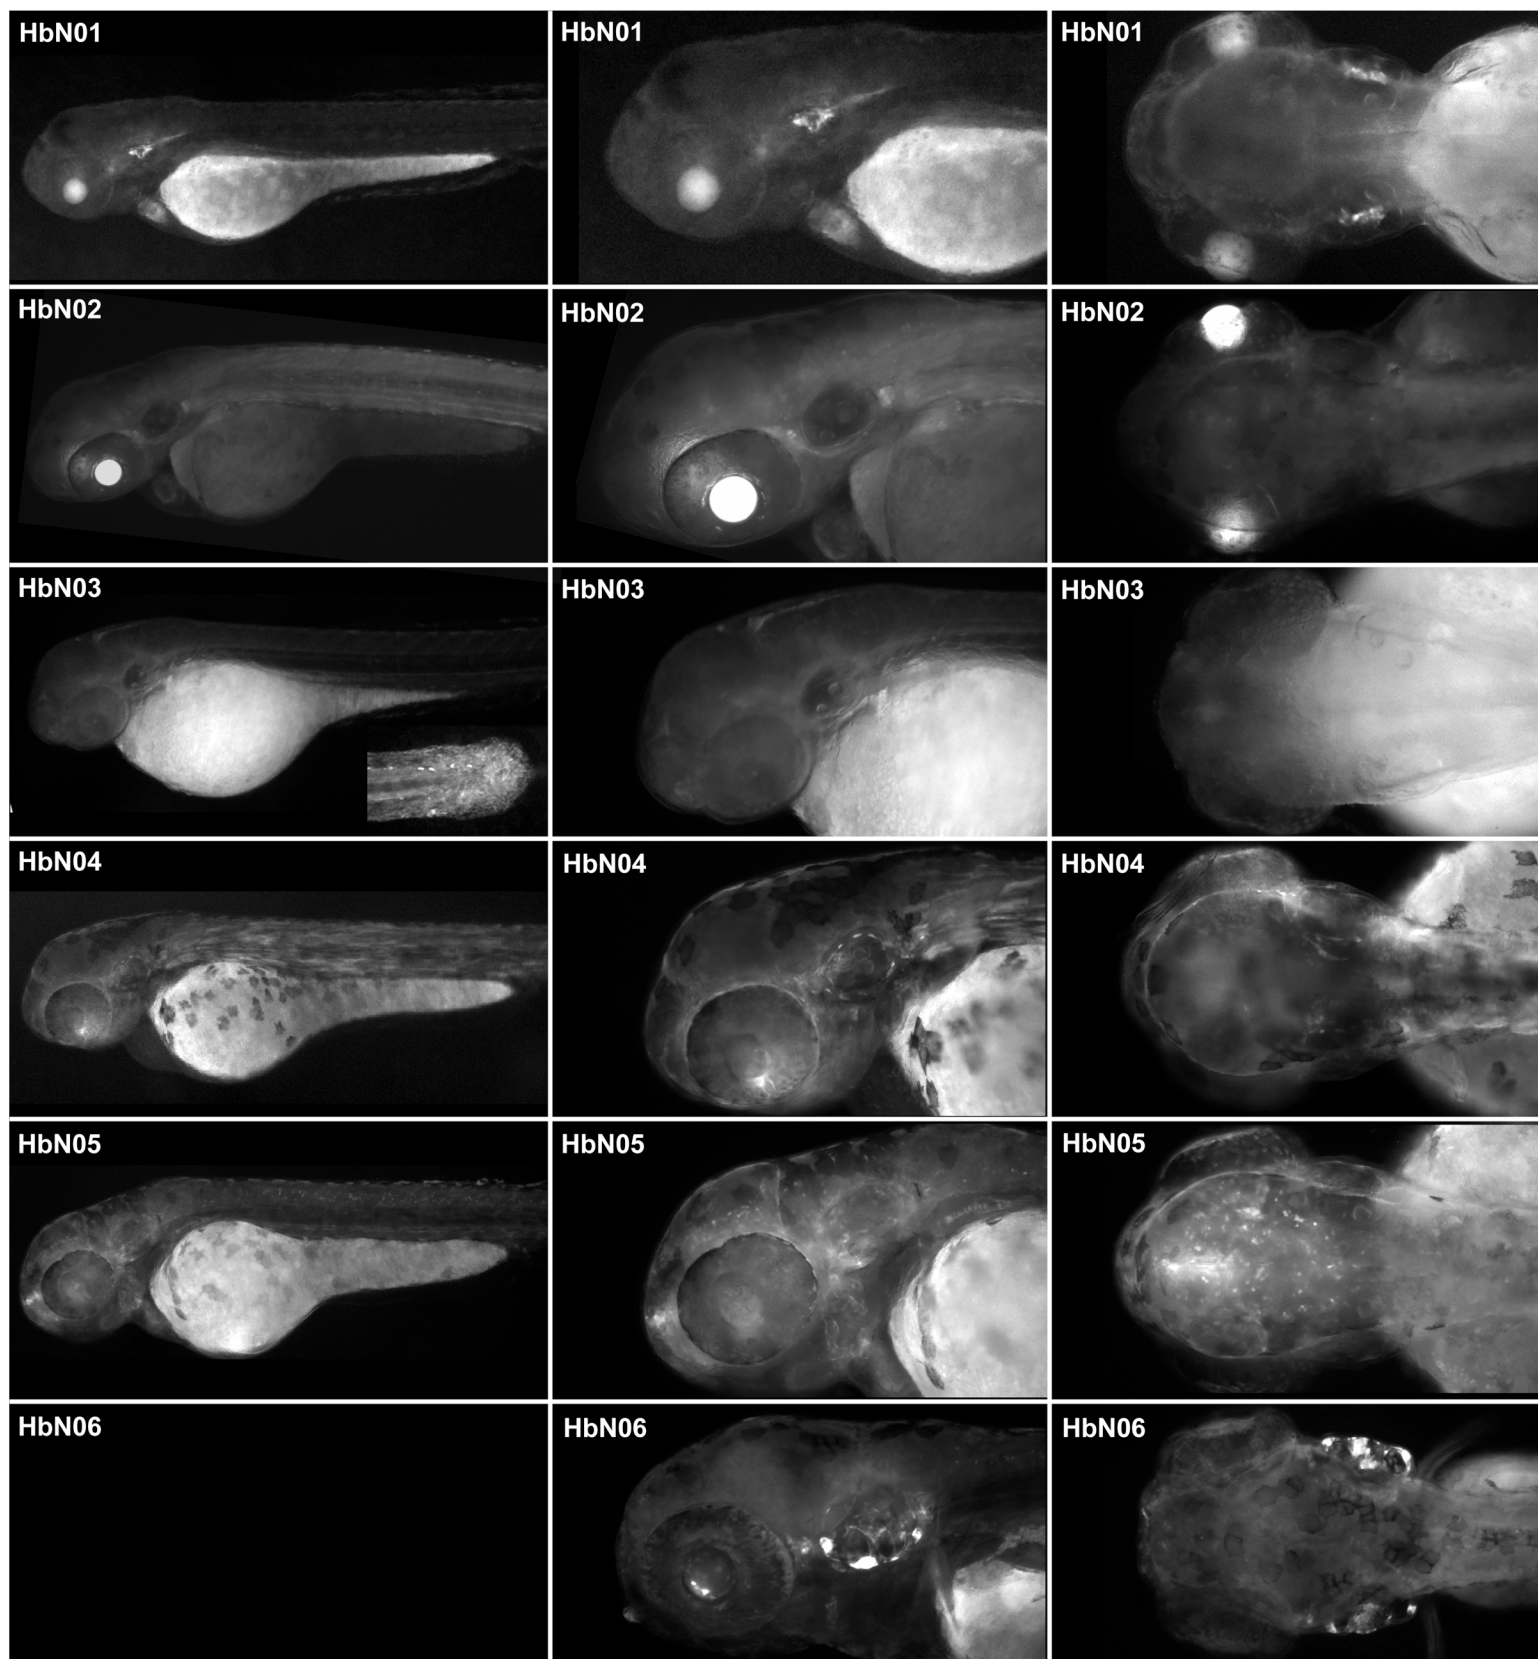

Figure S3\_panel\_6

Supplement: Figure_S5_panel_6.pdf [file Figure_S5_panel_6.pdf]
